# Supplementary material
Source: PubMed Central journal article supplement (PMC3594009)
Supplement: mt2012235x1.pdf [file mt2012235x1.pdf]

# Supplemental Figure S1

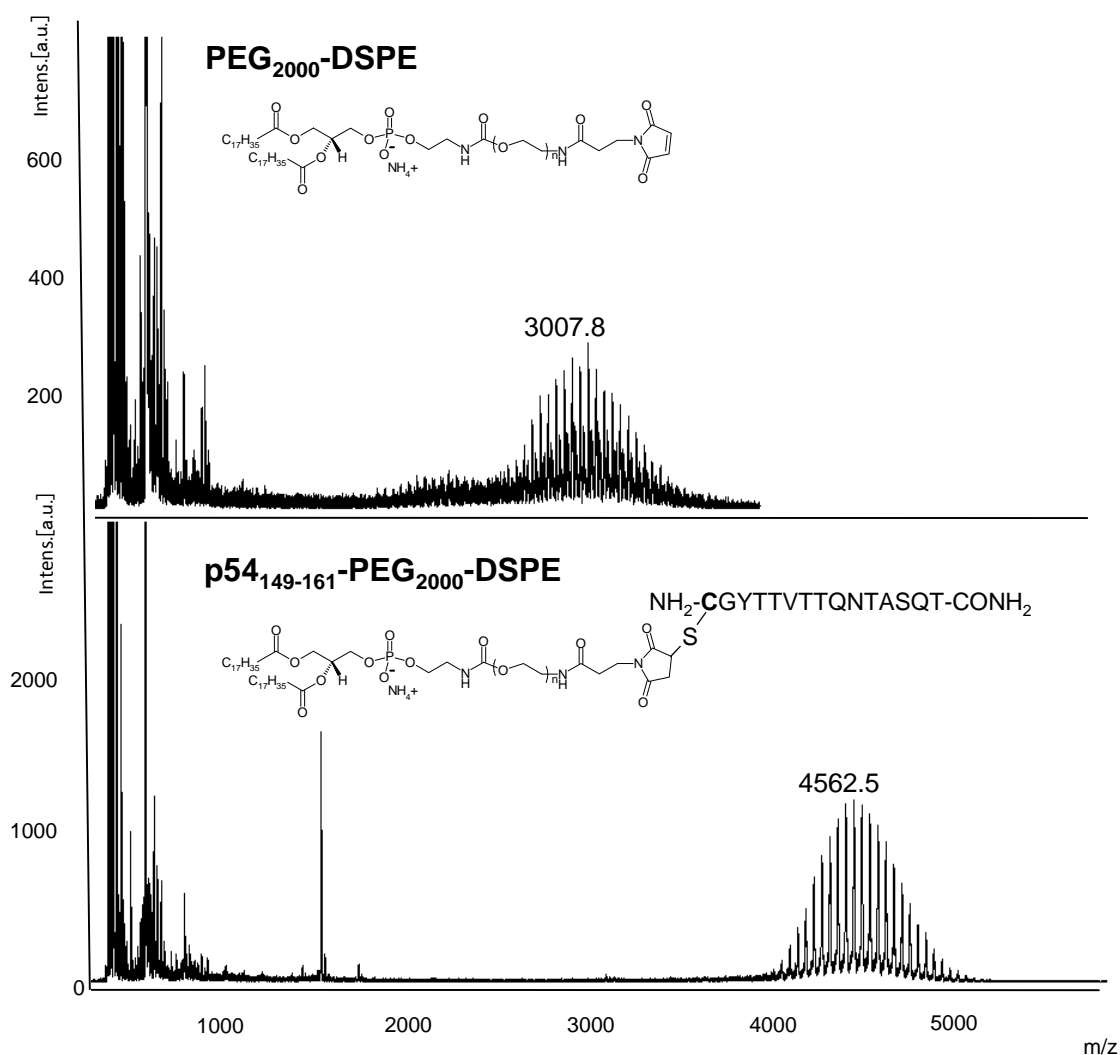

**Supplemental Figure S1:**  
Conjugation of p54<sub>149-161</sub> with PEG-lipid

p54<sub>149-161</sub>-PEG2000-DSPE was synthesized by conjugation of a cystein-introduced and C-terminally amidated peptide (NH<sub>2</sub>-CGYTTVTTQNTASQT-CONH<sub>2</sub>) (calculated MW 1574.7 and observed MW 1579.2) with Maleimide-PEG-DSPE (calculated Mn 2936.3 and observed Mn 3007.8) in DMSO.

A MALDI-TOF MS analysis was performed on the Maleimide-PEG-DSPE (upper) and the conjugation of P54<sub>149-161</sub>-PEG2000-DSPE (below) was confirmed from fragment shifts.
