# Supplementary material
Source: PubMed Central journal article supplement (PMC3594009)
Supplement: mt2012235x2.pdf [file mt2012235x2.pdf]

## Supplemental Figure S2

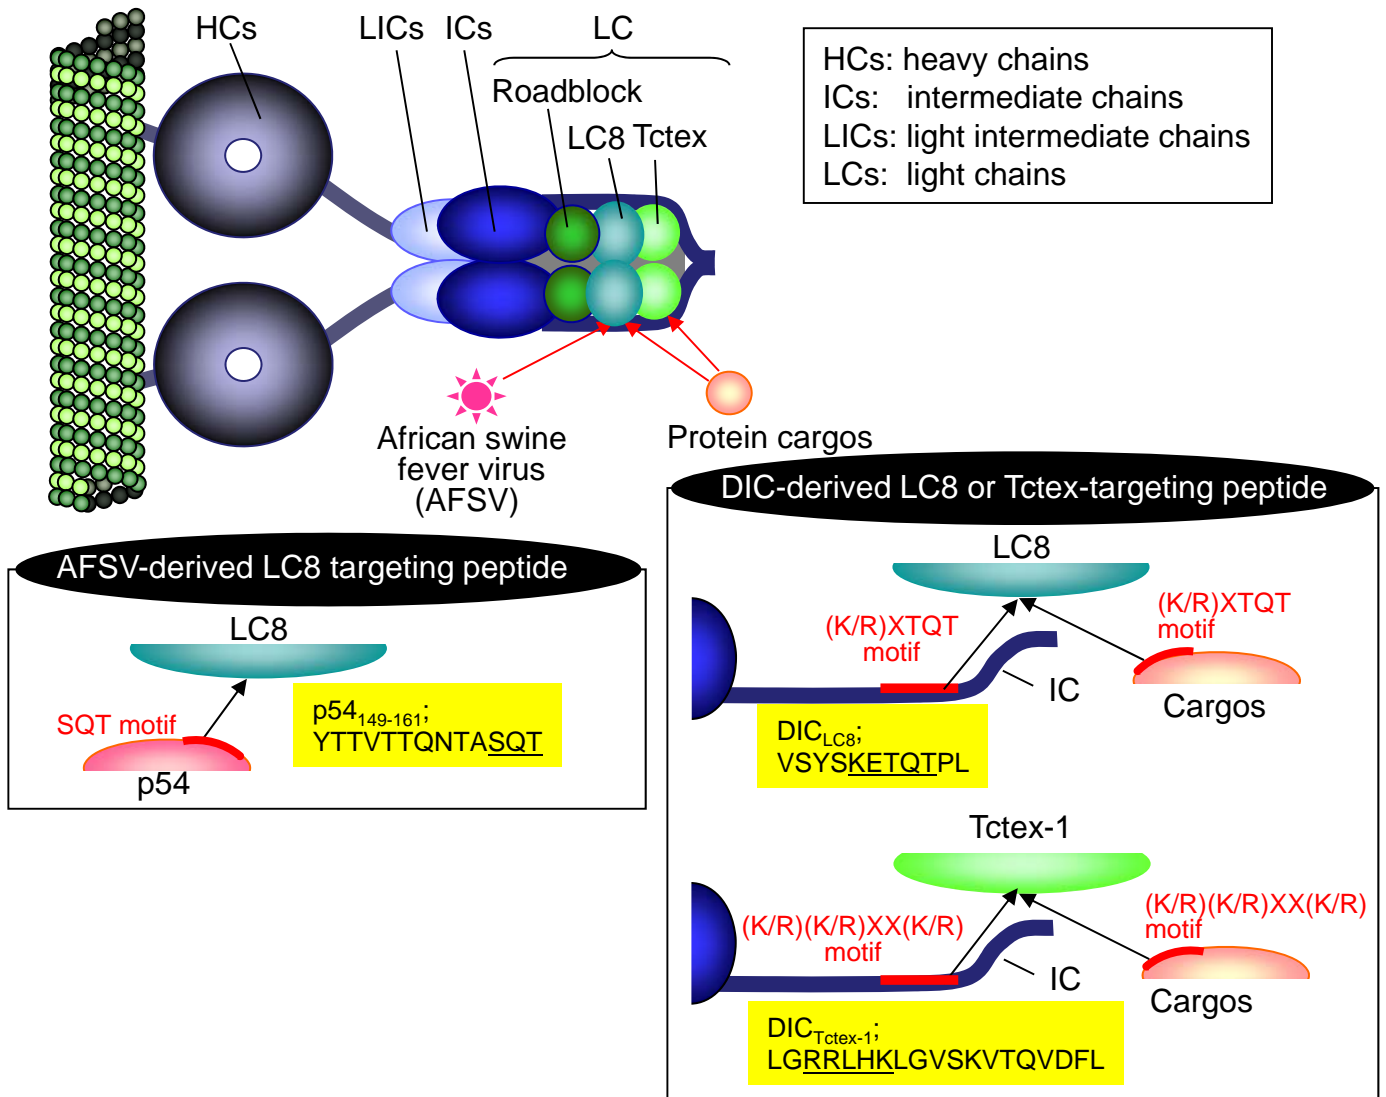

### Supplemental Figure S2:

Schematic diagram illustrating a dynein complex and its targeting peptide

In the present study, we mainly focused on the African swine fever virus protein p54-derived dynein-targeting peptide; p54<sub>149-161</sub> (YTTVTTQNTASQT), which was identified as LC8-associating domain. As a comparison, we used DIC-derived sequences (DIC<sub>LC8</sub>; VSYSKETQTPL and DIC<sub>Tctex-1</sub>; LGRRLHKLGVSKVTQVDFL) which share the consensus binding motifs (underlined) with other potential cargos.
