# Supplementary material
Source: PubMed Central journal article supplement (PMC3594009)
Supplement: mt2012235x3.pdf [file mt2012235x3.pdf]

## Supplemental Figure S3

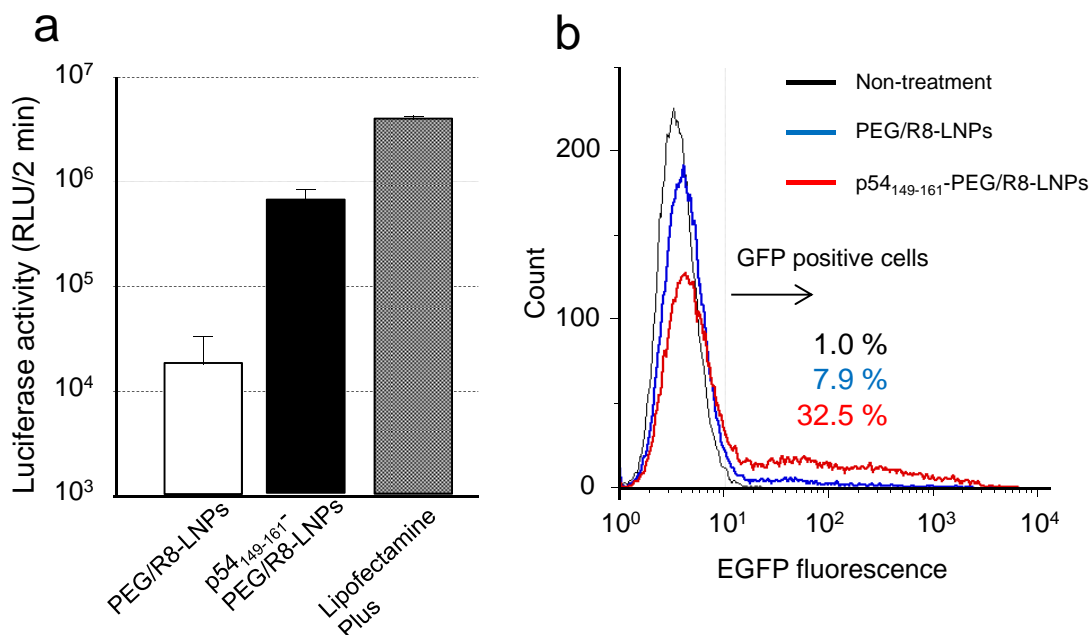

### Supplemental Figure S3:

Transfection activities of PEG/R8-NLPs and p54<sub>149-161</sub>-PEG/R8-NLPs

8 × 10<sup>4</sup> cells were seeded on 35-mm culture dishes in 2 mL of culture medium 1 day before transfection. For the transfection, a 2 ml aliquot of PEG/R8-NLPs or p54<sub>149-161</sub>-PEG/R8-NLPs including 1.6 μg DNA encoding (a) pcDNA3.1-GL3 or (b) pEGFP-N1 (Clontech, Palo Alto, CA, USA) was incubated with the cells in serum- and antibiotics-free DMEM for 3h. Transfection with the Lipofectamine Plus reagent was demonstrated according to the manufacturer's instructions. The following procedures to evaluate the gene expression efficacies of luciferase (a) and EGFP (b) were evaluated as follows;

**a.** The medium was then replaced with fresh phenol red-free medium containing 10% serum and 100mM D<sub>2</sub>-luciferin. The dishes were set in a luminometer incorporated in a small CO<sub>2</sub> incubator (ATTO Co. Ltd.), and the bio luminescence was monitored at 8 h (2min collection time).

**b.** At 24 h post-transfection, The cells were then trypsinized and collected by centrifugation at 3000 rpm at 4°C for 5 min. Cells were washed in ice-cold PBS two times by repeating the centrifugation and suspension steps. Finally, cells were suspended in 500 μL of FACS buffer (ice-cold PBS solution containing 0.1% sodium azide and 0.5% BSA). The cell suspension was filtered through a nylon mesh (45 μm mesh size) to remove cell aggregates and dust, and the cells were then analyzed using a FACS Calibur flow cytometer (BD Biosciences, San Jose, CA, USA).

Histograms indicated the resultant fluorescence intensity of EGFP when transfected by PEG/R8-NLPs (blue) and p54<sub>149-161</sub>-PEG/R8-NLPs (red) analyzed 30,000 cells by FACS. Autofluorescence derived from the non-transfected (control) cells were represented by black lines.
